# Supplementary material for: In Silico Exploration of 1,7-Diazacarbazole Analogs as Checkpoint Kinase 1 Inhibitors by Using 3D QSAR, Molecular Docking Study, and Molecular Dynamics Simulations
Source: MDPI journal article supplement (doi:10.3390/molecules21050591), 2016-05-05

# Supplementary Material: *In Silico* Exploration of 1,7-Diazacarbazole Analogs As Checkpoint Kinase 1 Inhibitors By Using 3D QSAR, Molecular Docking Study, and Molecular Dynamics Simulations

Xiaodong Gao, Liping Han and Yujie Ren

The structure of all the aligned molecular dataset used for the 3D QSAR studies were shown in Figure 1A. The 3D structures of the studies molecules were drawn and the 3D-QSAR studies were performed in SYBYL-X 2.0.

Table S1. Chemical structural formulas of all structures.

| No. | 2D Structure                                                                        | 3D Structure                                                                          |
|-----|-------------------------------------------------------------------------------------|---------------------------------------------------------------------------------------|
| 1   | 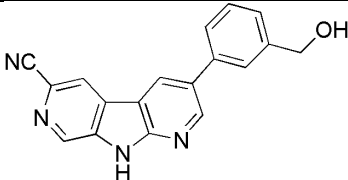   |    |
| 2   |   |   |
| 3   |  |   |
| 4   |  |  |
| 5   |  |   |
| 6   |  |  |

7

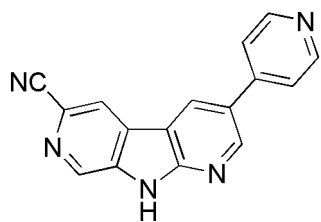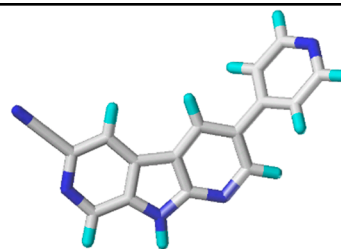

8

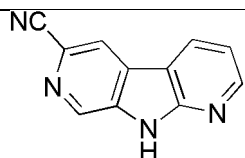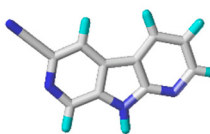

9

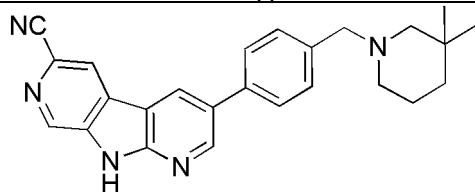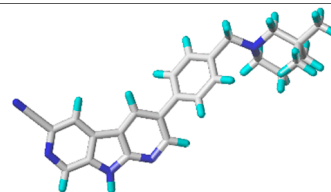

10

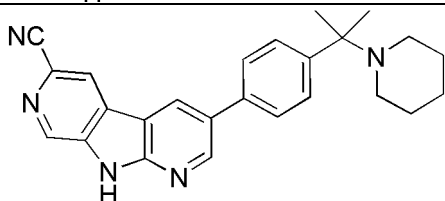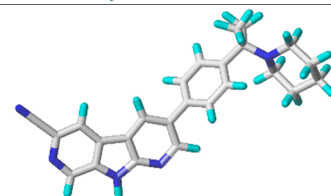

11

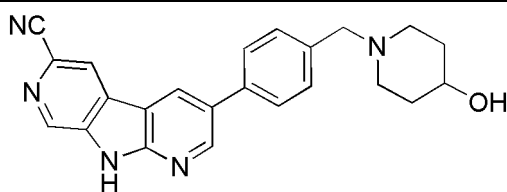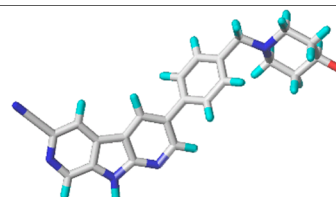

12

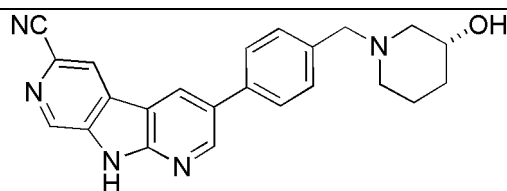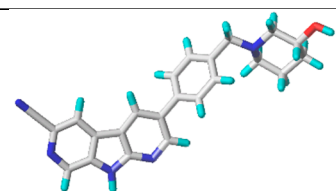

13

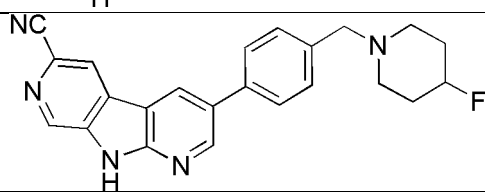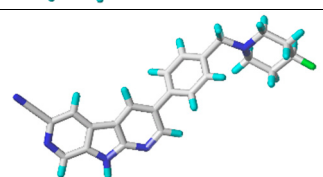

14

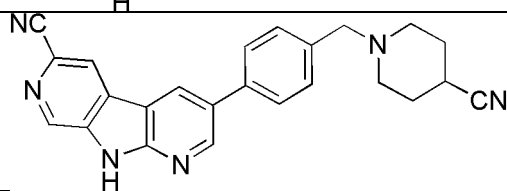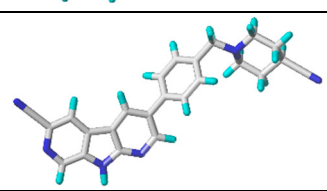

15

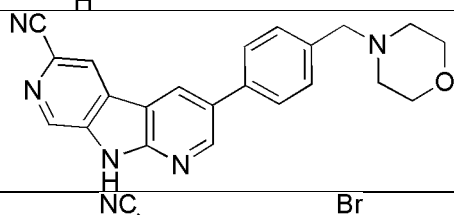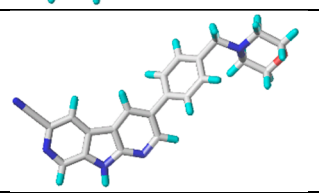

16

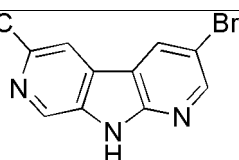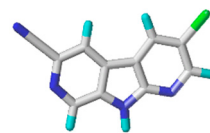

17

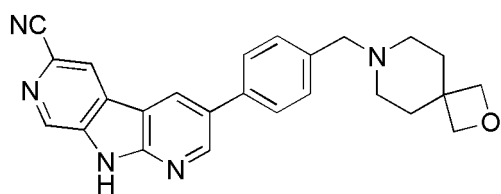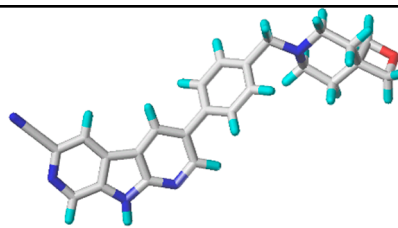

18

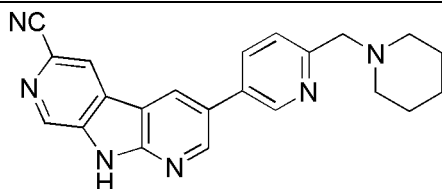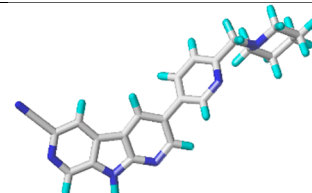

19

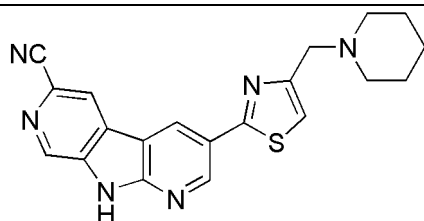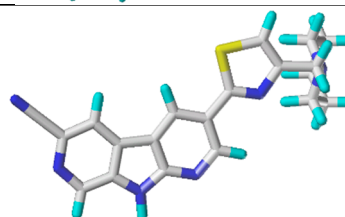

20

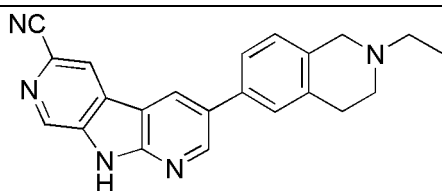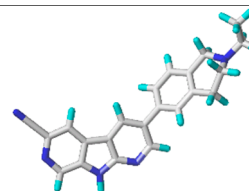

21

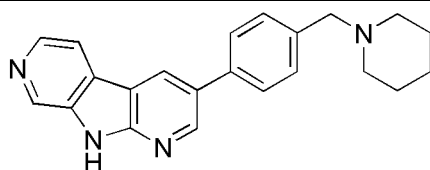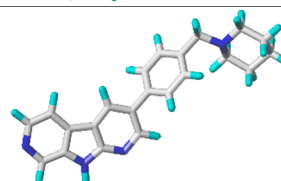

22

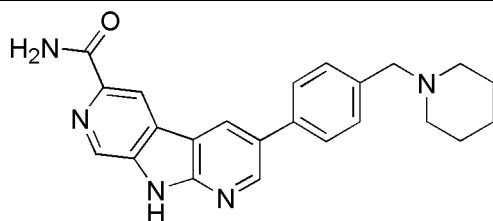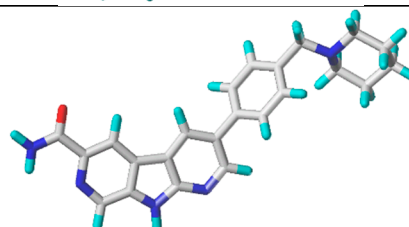

23

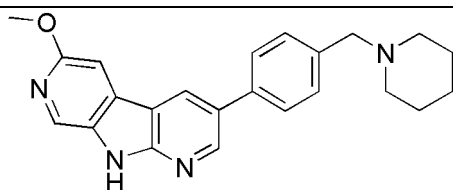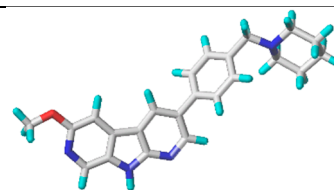

24

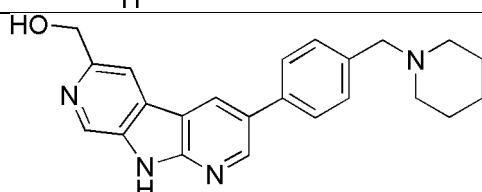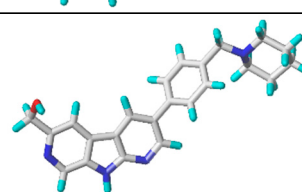

25

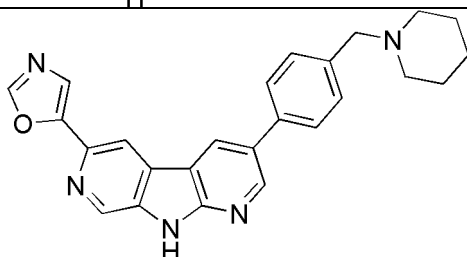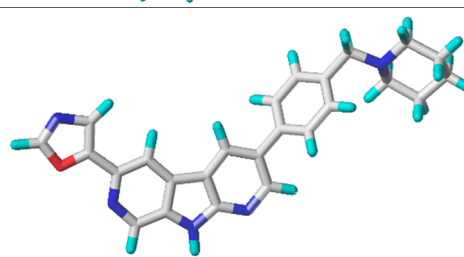

26

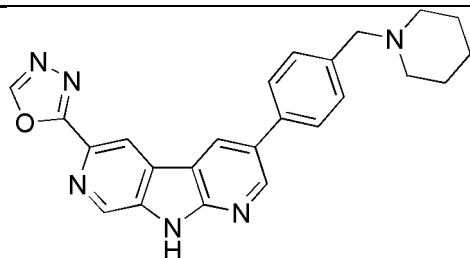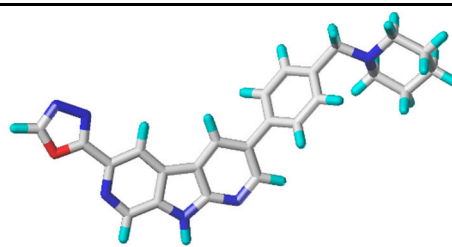

27

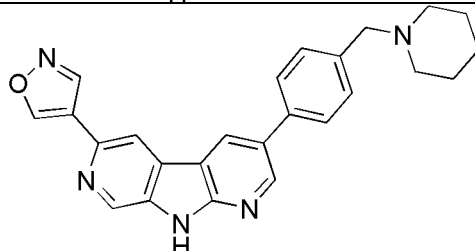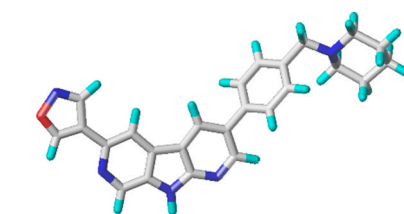

28

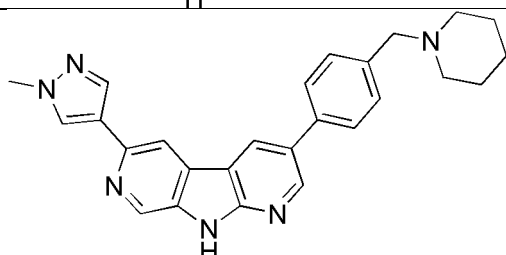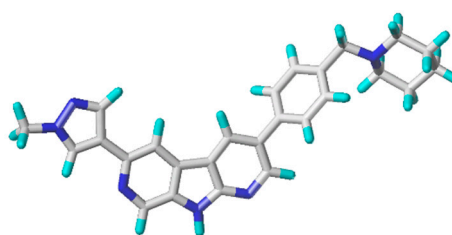

29

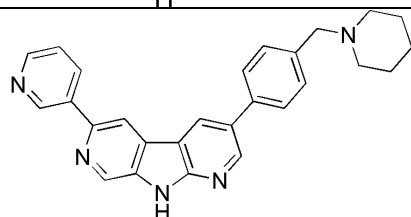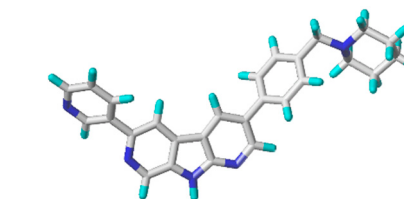

30

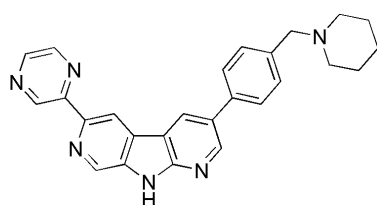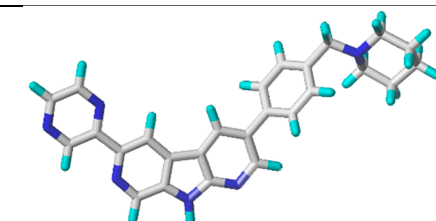

31

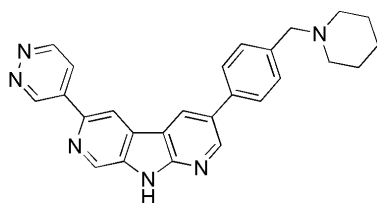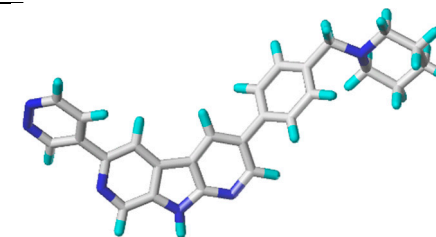

32

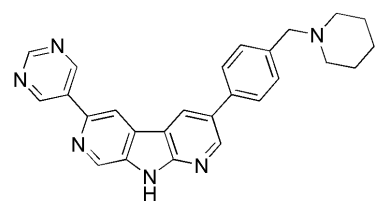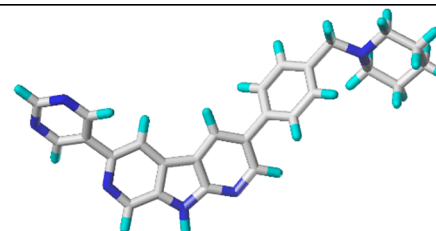

33

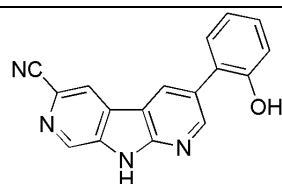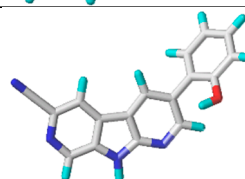

34

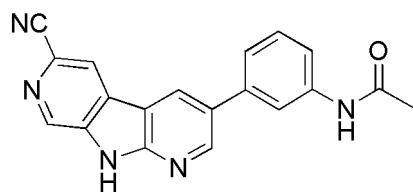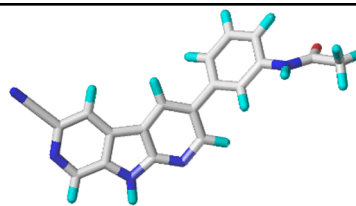

35

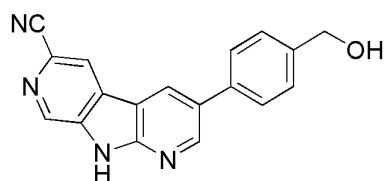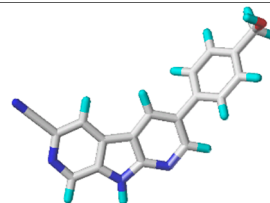

Test1

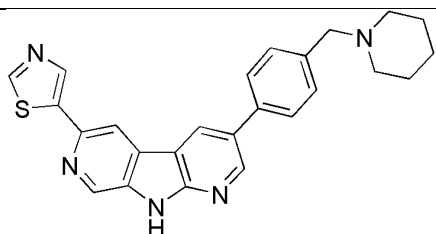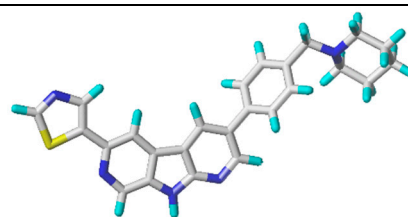

Test2

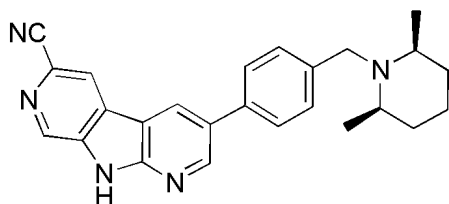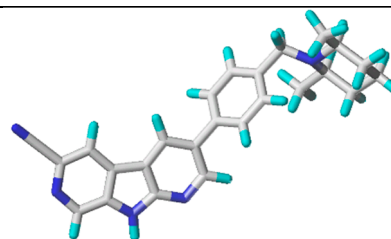

Test3

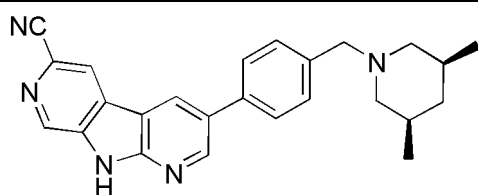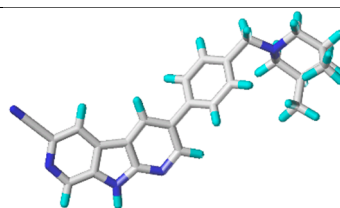

Test4

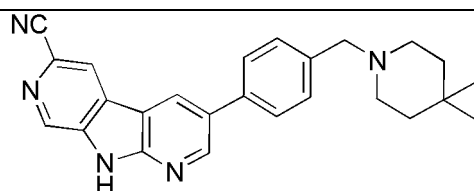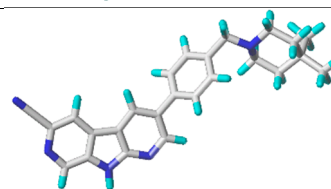

Test5

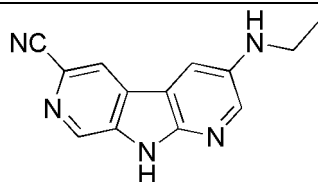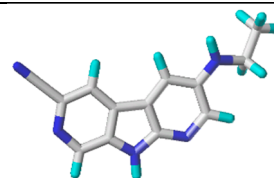

Supplement: s1 [file s1]
